# Supplementary material for: Rapid and efficient generation of neural progenitors from adult bone marrow stromal cells by hypoxic preconditioning
Source: PubMed Central journal article supplement (PMC5055711; doi:10.1186/s13287-016-0409-x), 2016-10-07
Supplement: 13287_2016_409_MOESM1_ESM.pdf [file 13287_2016_409_MOESM1_ESM.pdf]

# Derivation of fate-committed Schwann cells from BMSCs

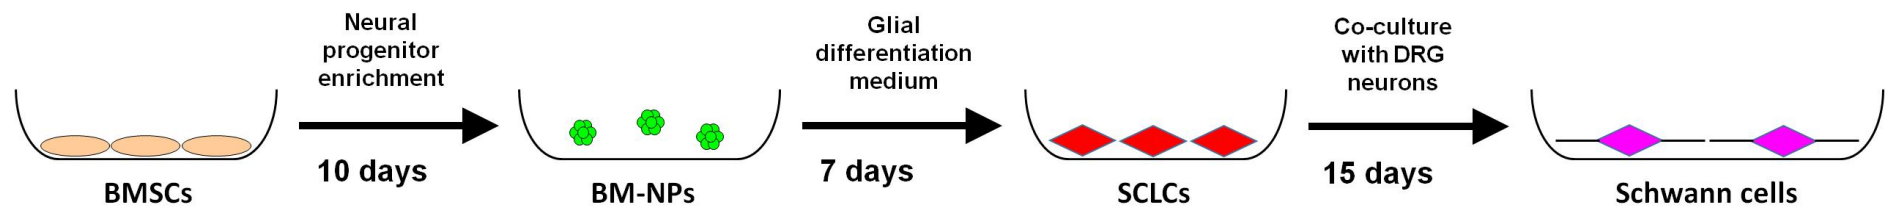

**BMSC = bone marrow stromal cell**

**BM-NP = bone marrow-derived neural progenitors**

**SCLC = Schwann cell-like cell**
