# Supplementary material for: Rapid and efficient generation of neural progenitors from adult bone marrow stromal cells by hypoxic preconditioning
Source: PubMed Central journal article supplement (PMC5055711; doi:10.1186/s13287-016-0409-x), 2016-10-07

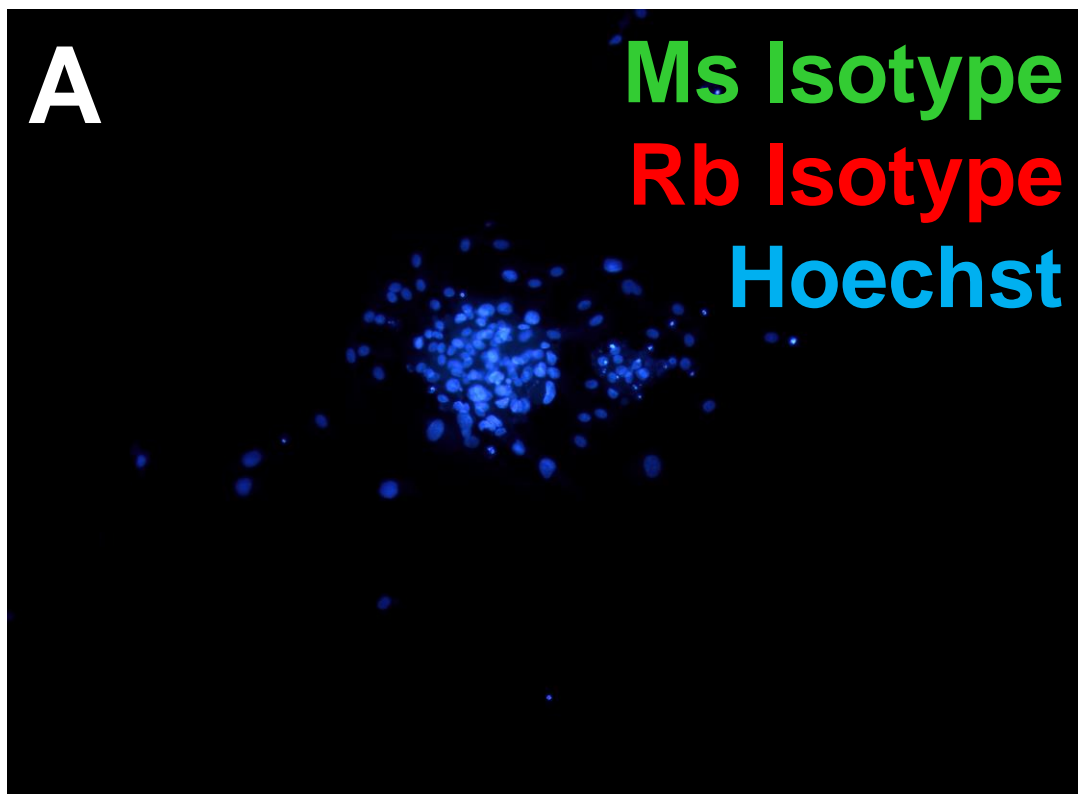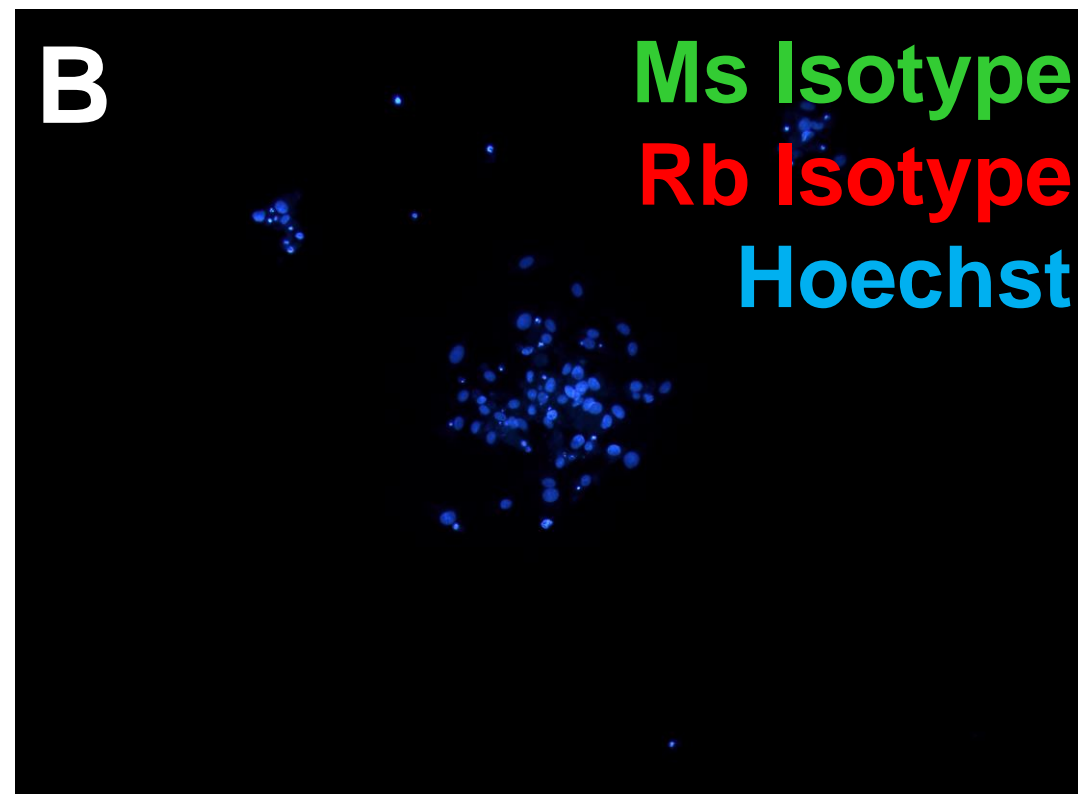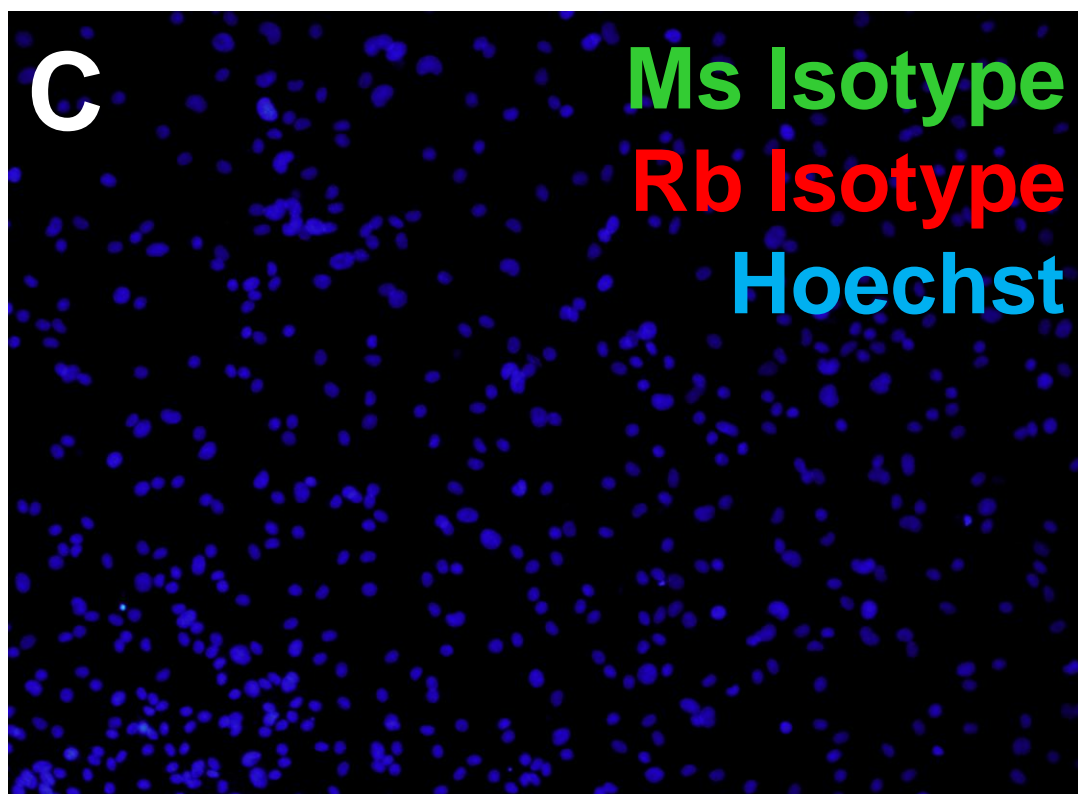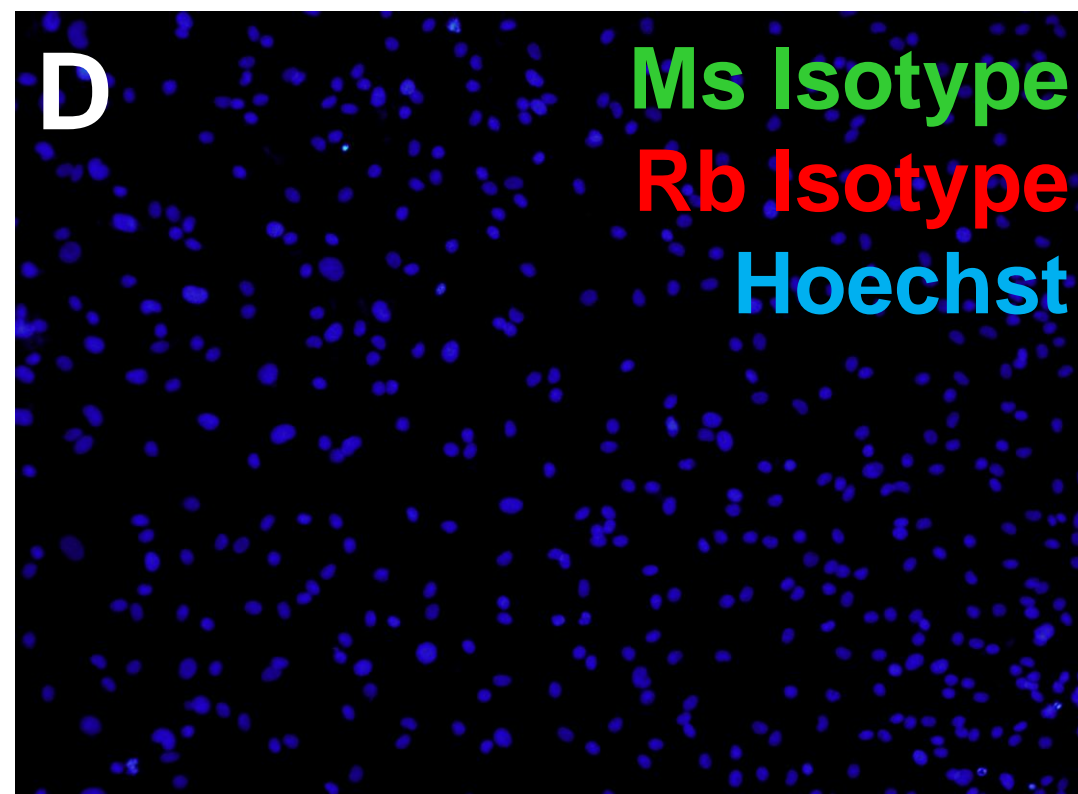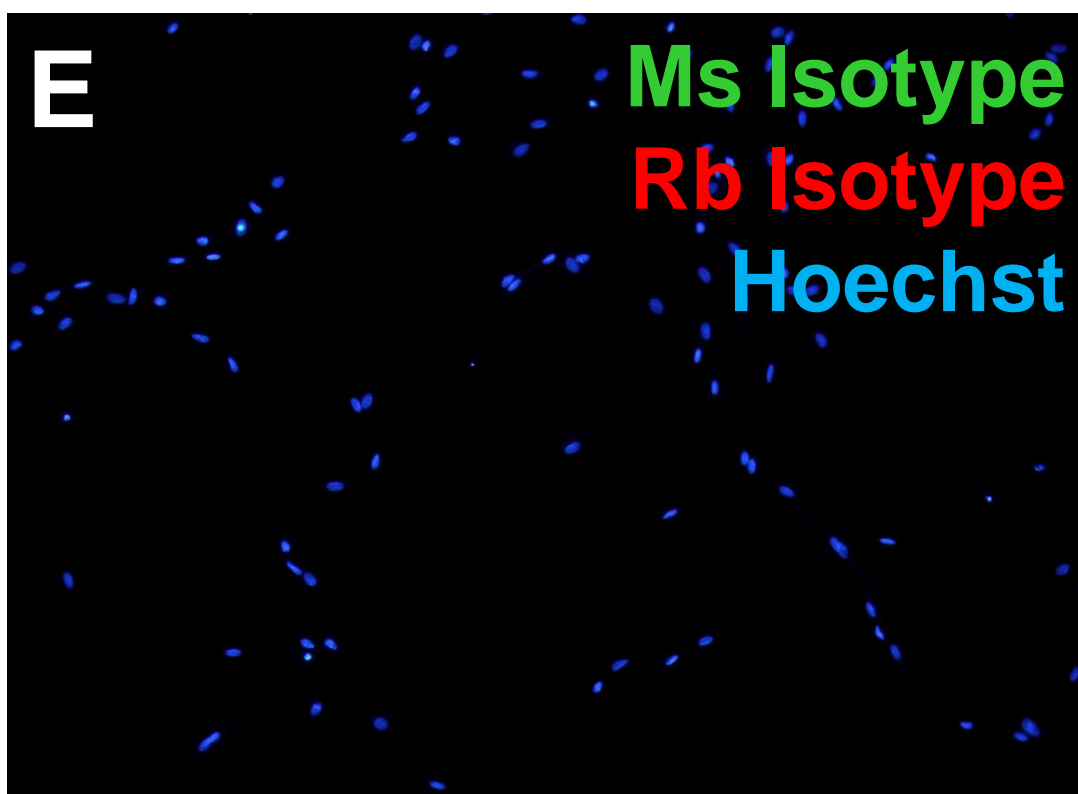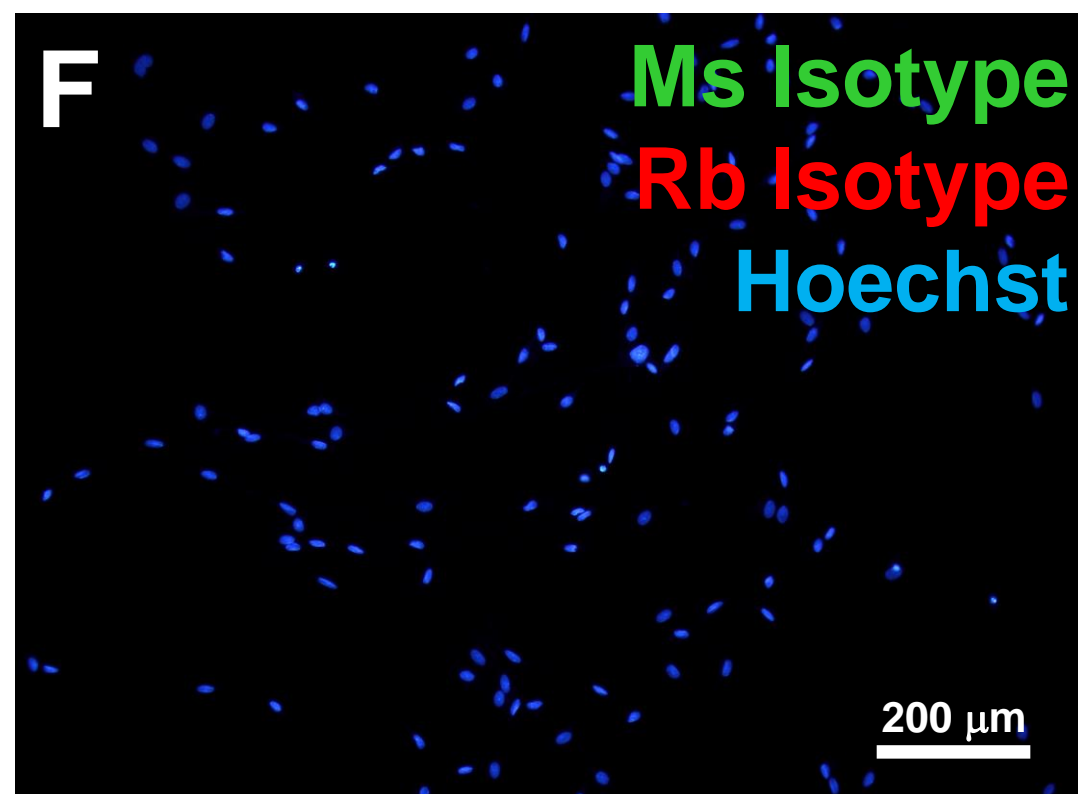

Supplement: 13287_2016_409_MOESM2_ESM.pdf [file 13287_2016_409_MOESM2_ESM.pdf]
