# Supplementary material for: Rapid and efficient generation of neural progenitors from adult bone marrow stromal cells by hypoxic preconditioning
Source: PubMed Central journal article supplement (PMC5055711; doi:10.1186/s13287-016-0409-x), 2016-10-07

# 3T3 cells

# HuBMSCs

Tuj-1

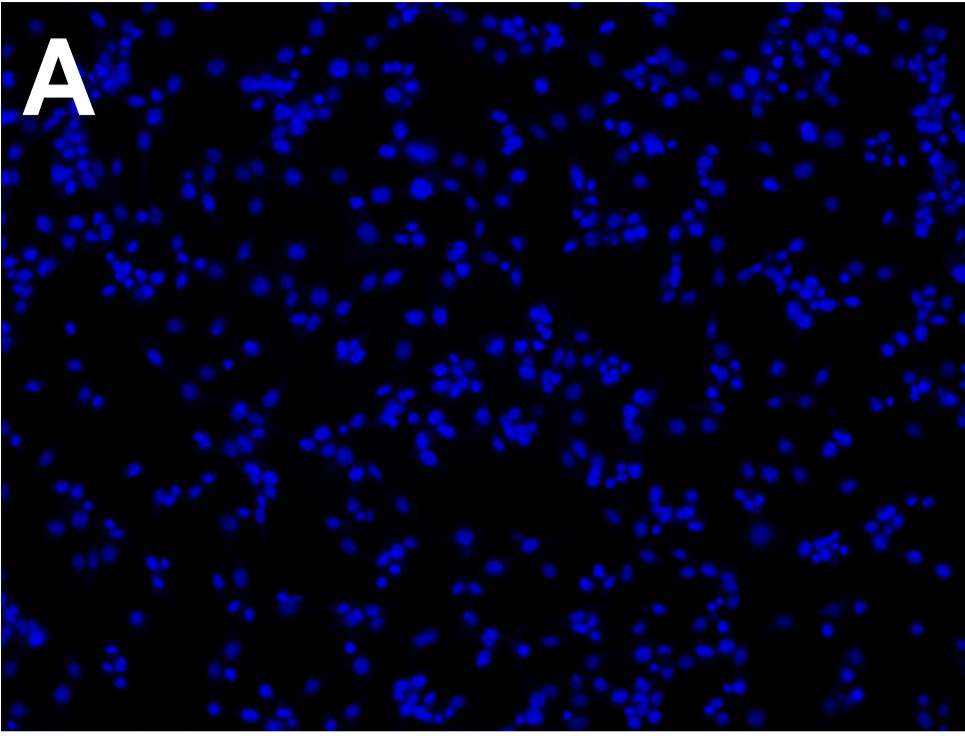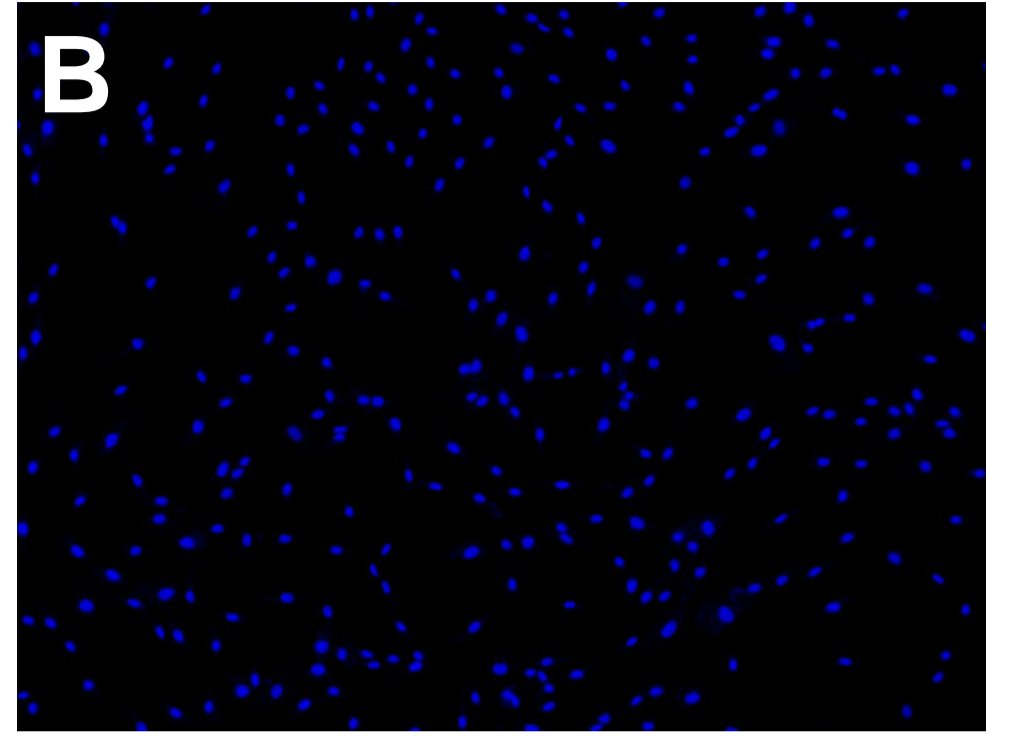

GFAP

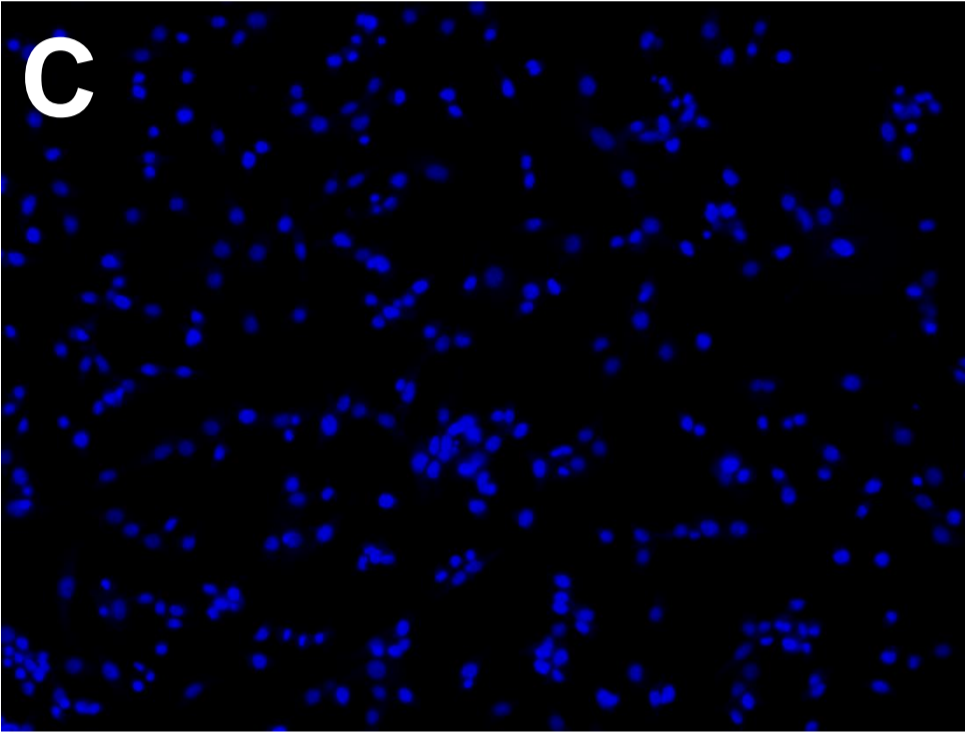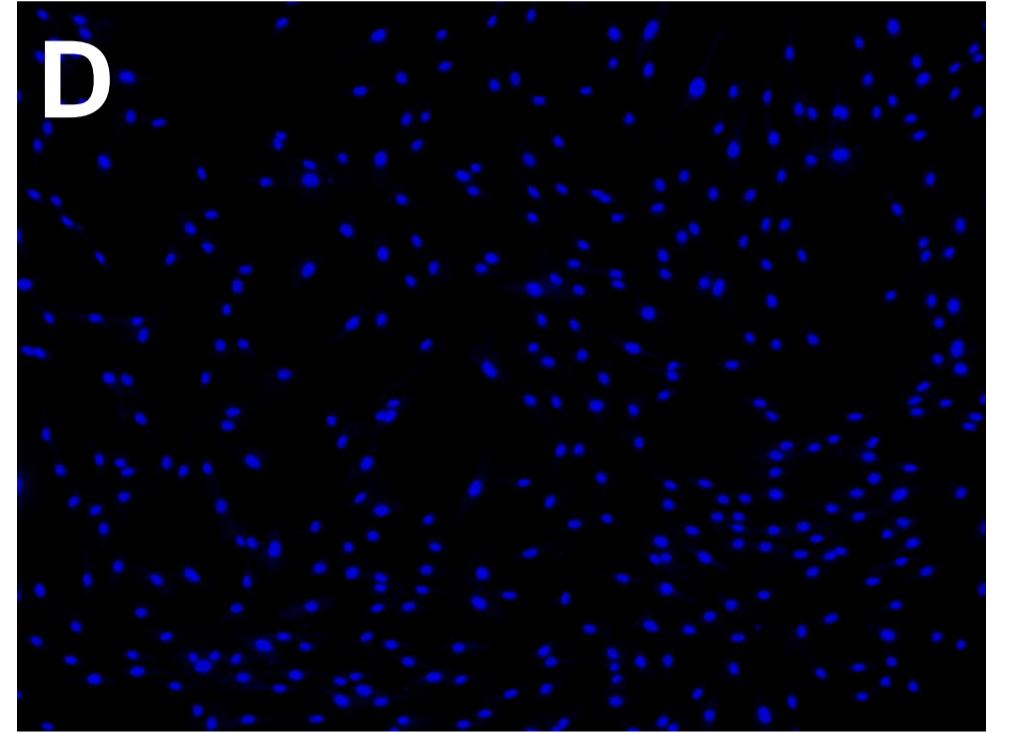

p75

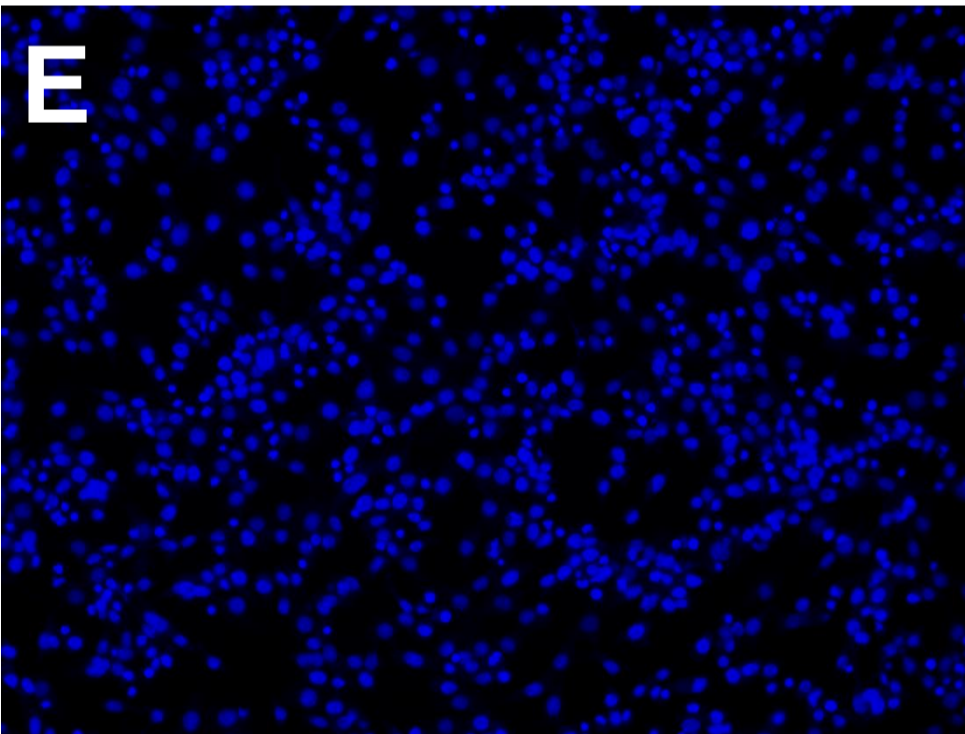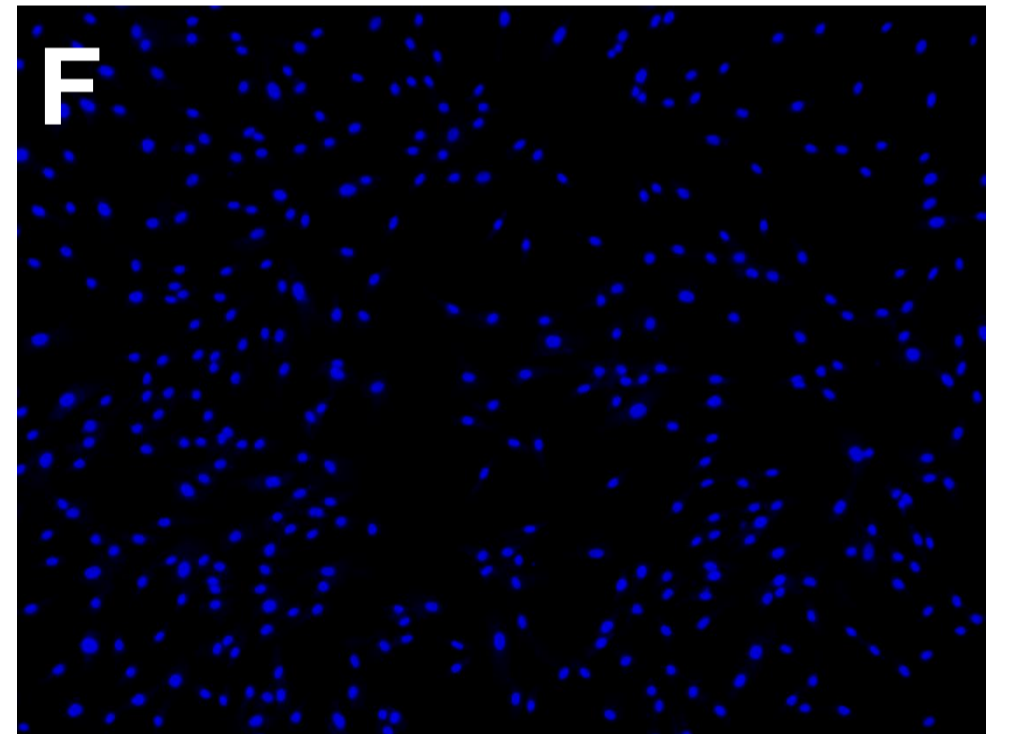

S100β

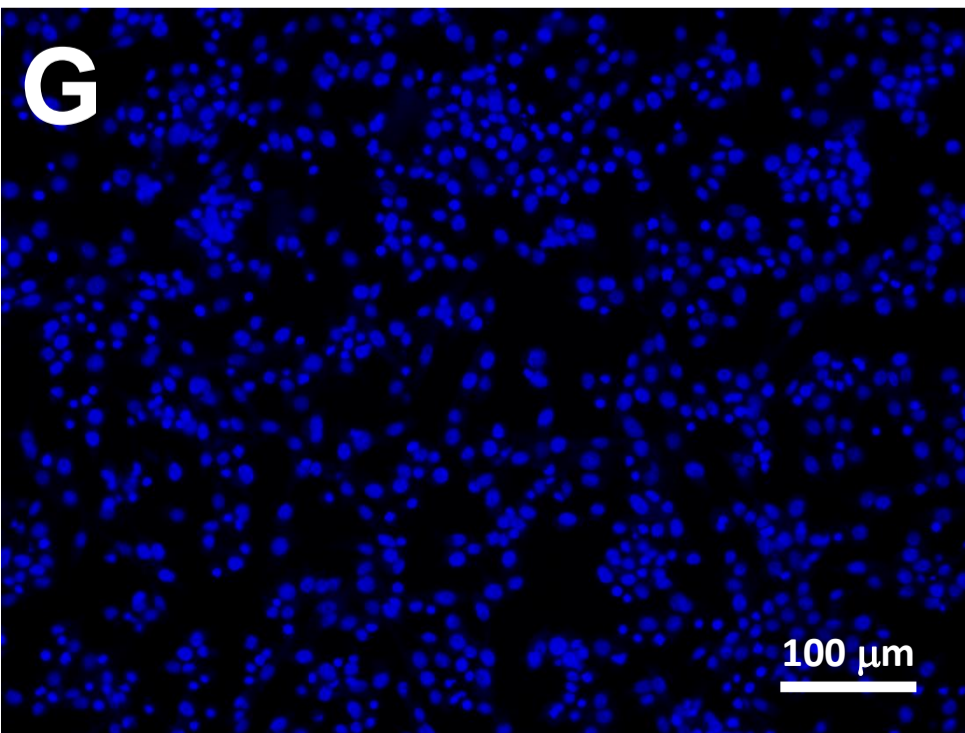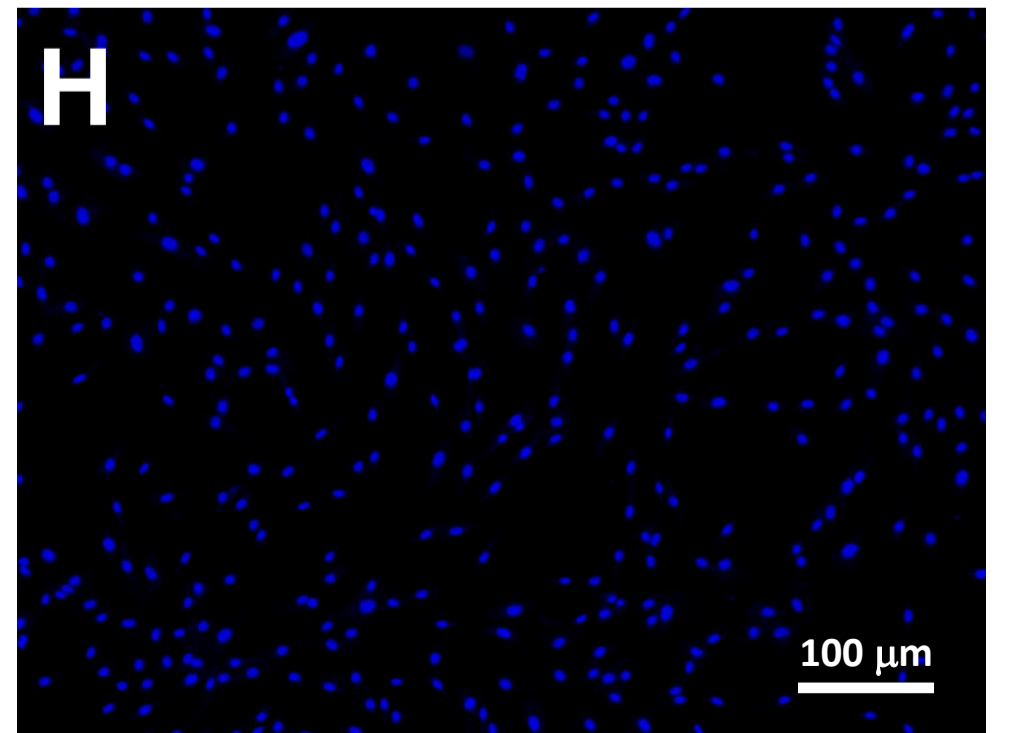

Supplement: 13287_2016_409_MOESM3_ESM.pdf [file 13287_2016_409_MOESM3_ESM.pdf]
